# Supplementary material for: High-throughput discovery of post-transcriptional cis-regulatory elements
Source: PubMed Central journal article supplement (PMC4778349; doi:10.1186/s12864-016-2479-7), 2016-03-03
Supplement: 12864_2016_2479_MOESM5_ESM.pdf [file 12864_2016_2479_MOESM5_ESM.pdf]

**A**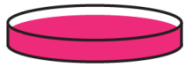

x 180

**B**

|     |
|-----|
| 155 |
| 165 |
| 120 |
| 253 |

**C** mean colonies per plate: 173.25  
standard deviation: 49  
calculated # integrants: 31185 ± 8820 colonies

**Additional file 5. Estimating number of integration events.** (A) We performed the FLP/FRT transfection on forty-five 10cm<sup>2</sup> plates, then diluted the cells from each plate to four plates, resulting in a total of one hundred and eighty plates. (B) Counts of integration events. After selecting with hygromycin for 10-11 days, we counted the number of cell colonies, indicating individual integration events, on four plates. (C) Calculating total number integration events based on counts in B.
