# Supplementary material for: High-throughput discovery of post-transcriptional cis-regulatory elements
Source: PubMed Central journal article supplement (PMC4778349; doi:10.1186/s12864-016-2479-7), 2016-03-03
Supplement: 12864_2016_2479_MOESM10_ESM.pdf [file 12864_2016_2479_MOESM10_ESM.pdf]

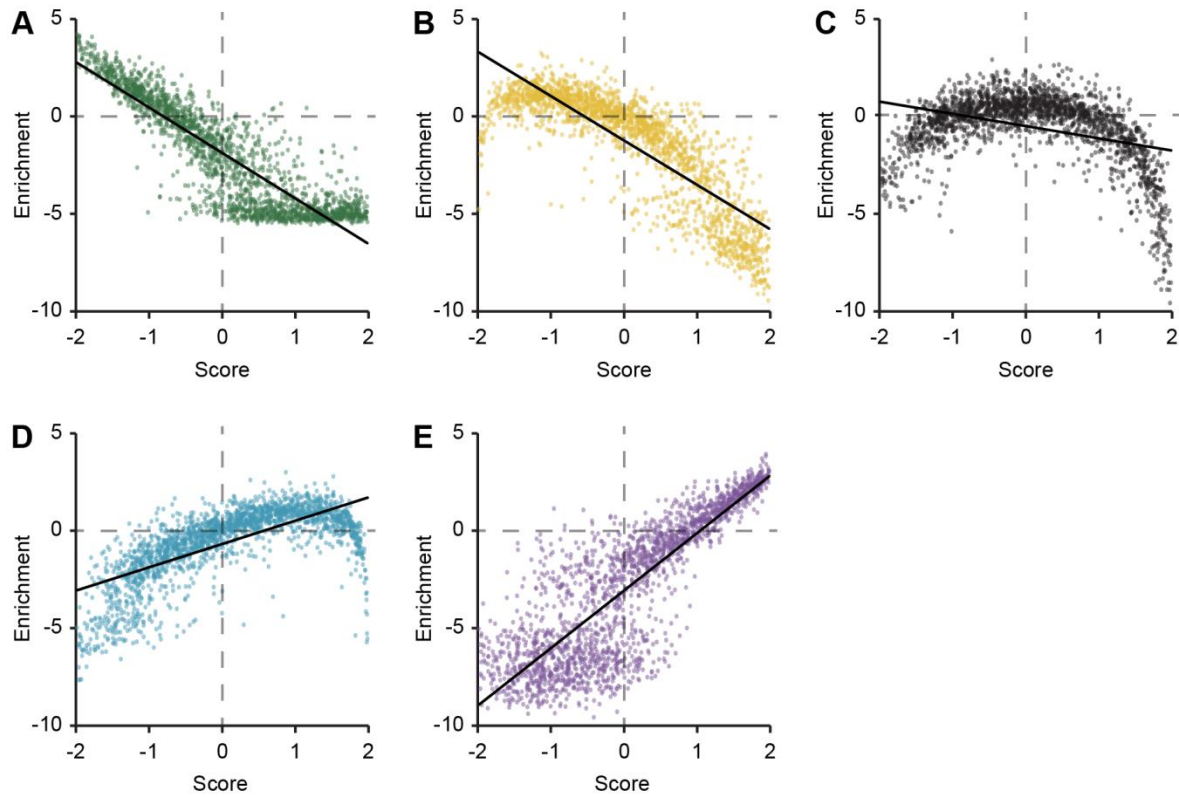

**Additional file 10. Enrichment and scores for each 8mer.** To examine the relation between the score metric and enrichment in each sorted GFP sub-population, we plotted each 8mer's score (x-axis) and enrichment (y-axis) for each GFP sub-population. (A) 0-10% (lowest GFP bin). Pearson  $r=-0.887$ ,  $p<10^{-5}$ . (B) 20-30%. Pearson  $r=-0.831$ ,  $p<10^{-5}$ . (C) 40-60%. Pearson  $r=-.0362$ ,  $p<10^{-5}$ . (D) 70-80%. Pearson  $r=0.679$ ,  $p<10^{-5}$ . (E) 90-100% (highest GFP bin). Pearson  $r=0.848$ ,  $p<10^{-5}$ .
