# Supplementary material for: High-throughput discovery of post-transcriptional cis-regulatory elements
Source: PubMed Central journal article supplement (PMC4778349; doi:10.1186/s12864-016-2479-7), 2016-03-03
Supplement: 12864_2016_2479_MOESM19_ESM.pdf [file 12864_2016_2479_MOESM19_ESM.pdf]

## Additional file 19. Sequences of UTRs assayed in Figure 6.

Reporter plasmids were constructed in pMirGlo. Listed are sequences of UTR fragments; the 8mer that was mutated is underlined. The following mutations were made:

| Original 8mer | Mutated 8mer |
|---------------|--------------|
| GAAGGTGA      | cAAcGTcA     |
| ACAGGGTA      | AgAcGcTA     |
| AGGTAAGT      | tGGatAGT     |
| GTACTATT      | cTAgTATa     |
| TGTTCTAT      | TcTagTAT     |
| GTTTATAT      | GaTTAatT     |
| GTGAGTTT      | GaGtGTaT     |
| GTTGCATT      | GTacgtTT     |

### PPP1R3C

CATTAATGGCTAACAAACACGTAGGGACTTCATGTCATGTCAAAGATAGCTCTTTGCAAGTGCCTTGATTA  
AACCAGAAAACGTGCATCGTTTAAACCCAAATATCTGAATGGTCATCTGGTAACTCATGGGTTTTTGGCCT  
CATAAGATGGTCCACTCTGTACACAGGCATTCCCTCCTGCAATAATGTTGTATCTTTGAGACCGTTGTCAG  
TGTACACAACCTCACATCCTTCATATTGAAGGTGACTCATTCTTCTGCACACTTTTTTGATGTGATGCTTG  
ACGTGAGGCCCGACACTAGGATTCTCAATGCAAGAATCCAGTACCTTGCACATAGAAGTAGCAACCCATC  
CCTTGCCTATTTTCATCTTGCTGTTTTCTTTTTTAAAAAATGGATGTGACTTGTGTTTGAATGTTTTG  
TATTATACTTGTGTTTTGTGTGTGCATAAATTCATCTGTAGGATCTTAAGAAAAAGAGTCCCAGAATGTT  
GCTTCTATT

### E2F1

TTATACCCCTCTCCTCTGTCTCCAGAAGCTTCTAGCTCTGGGGTCTGGCTACCGCTAGGAGGCTGAGCAA  
GCCAGGAAGGGAAGGAGTCTGTGTGGTGTGTATGTGCATGCAGCCTACACCCACACGTGTGTACCGGGGG  
TGAATGTGTGTGAGCATGTGTGTGTGCATGTACCGGGGAATGAAGGTGAACATACACCTCTGTGTGTGCA  
CTGCAGACACGCCCCAGTGTGTCCACATGTGTGTGCATGAGTCCATGTGTGCGCGTGGGGGGGCTCTAAC  
TGCATTTTCGGCCCTTTTGCTCTGGGGGTCCACAAGGCCAGGGCAGTGCCTGCTCCAGAATCTGGTG  
CTCTGACCAGGCCAGGTGGGGAGGCTTTGGCTGGCTGGGCGTGTAGGACGGTGAGAGCACTTCTGTCTTA  
AAGGT

### PRPF4B

AAAATTAATGCTTGTCTCCCTGAGGAATATGGAAAATAATCAGATTTTAGGGGTTTAAATAATATTTTTTA  
AATTGTAAATGGGATTTTTTTTATTACCCAGGCACCTAATTACAACAAGCATGCACATTTTGGTGCATTC  
AAGAATGGAAAATCAGAATAGCAGCATTGATTCTTCTGGTGGGTTTTGCTCCATTTAAAGACATGAAATG  
AACTACAGCCAGGAAGGTGATAGATGATATAATAAGCCACCTCTGAACCTACACCCCGTCTCTTCACGGT  
TTAGACTTACTAAAATAAATAACAAGGTGATTTTCATCTTCAGGTAGAGTGAAGCCTTTTAAATTAAGGCGT  
CACAGGTGCAGCTATTCTACCTTAATGAAATGGGTAGTGATTTTCCCACATTATTTATTTTCGGTGATAA  
TATGCTGCATATTCAAGTCTCTTGTAGTTATTTTACCCAAAGTAGTTGACAATTTGATGCTTCTGGTGA  
TGTTTATGGCTTC

### TRIM33

TTTTTCTCATTTTTTATGCTGTTGGGTCTTAGTTTTTAAATTGATATAAAGAACTCAGCAATGGTTTTATT  
TTCTACTCATACTTAGGGTTTAGGAAACACTACCCTAGTTATCATTTAATCAACTTCAATGGTCTACTG  
AAACAAAATGGTAACTTTTCATTAGTGGATTATTTAGAGTTATAGTAGTTGTTTTCCAGAAAACACTTCC  
TCACAATTGTACTTCCCAATCAAAATCATGTGATCATAAGTTATTTCCCATGAAAGGCAGAATGTTTGT  
CAAAATTAATCTAGTTTTCTGTACATTTAAATTTGAGAAGGTGACAACCTGGCTCTTTTCCAGTCTTCCTT

CATGTCAGTTTTCTGATAGACCACTATTGGCAAACAGTATCTGTCAACTACCAAATGTGTAAAATTTTCT  
GTATTTCACTTTGTCTTATTTGTAAATAGTGAACATAAACTTTTGGCAGATCAG

### MTCH2

GAAAAAAGCAAGATTTGGAAAGGAAGTATAATGGCACTTTTTTCTCAAAGGAAGTTCTTGTTTTCACA  
TAAAAATATGAAAAGCAGATCCTGCAGGAGTAACCCCTTCTTTAAGAGCCAAGTATTTGCCAGTGCTTAA  
ATTACACCATACAGTTCTAATTATATATAATCTTTTGTCTTCAGTTTTTTGTTTTGTTTTCTTTTTGTT  
ATTGTTGCCGAAGGTGAGTAGTTTTGCATTTCTGATGACAGCCTTGGAAAGTATATTTGTAACCTCCATGT  
CTGGTAATGCCAACCAAGTGCACATGGGTCTTAGGACACTGACCACCTCACATGCCATACCCTCAGTTA  
AGCATGTTAACATTTATAGGAGGAAAAAATCACTTTGGGAGAAAAATAAAATTCACCTCAAGCATAAAGC  
TTCTGTTTACTCAGGCCCTTCTAAAAAGCAGGTTAAAAATGCTCTAAAATGAGAAAGCCTGTGGTTT

### TBLX1R1

AGATACTGAAAGTGCCTCCTTTTTGTGGTGTAAAAACAAATTATGGTGCAAAAAGTAATCACTAGATTGA  
AATACATGAAGGTTTTTTGCTTTTTGACATACGAAAATGTCAAGAGAAAGGCCAAAGATTTGTACTTTTT  
CACTTACAAAGCACTCCTTTTTCCCTTAACTTCTTTCTGTCAAATTAGATTTAATGAGAGAGTACTATT  
TTTAAGGAGCTATCTGTTTATGTAGAATGATTTTGTTAAGAGTAATGTAAACTATTATTGAGTAGAGGCC  
TAAAGAGGACTGTGCATTTTTGCTATTTAAAGGAATCACAAATGATCATACTTAAGTGAGCAAAAATGAC  
AAGTTTTACTAGCTAAGTAGAGAAAATAATCTCAAATGCAGCGCTACAATTTTCATTATCTTAAGTACAT  
TGTACATTTCTACAGAACCTGTGATTATTTCTCGCATGATAAGGATGGTACTTGCATATGGTGAATT

### VCAN

CTAACTTCCCTGTGCCTTTCCCTATCACCTCGAGAAGTAATTATCAGTTGGTTTTGGATTTTTGGACCACCGT  
TCAGTCATTTTTGGGTGGCGTGCTCCCAAACATTTTAAATGAAAGTATTGGCATTCAAAAGACAGCAG  
ACAAAATGAAAGAAAATGAGAGCAGAAAGTAAGCATTTCAGCCTATCTAATTTCTTTAGTTTTCTATTT  
GCCTCCAGTGCAGTCCATTTCCCTAATGTATAACCAGCCTACTGTACTATTTAAAATGCTCAATTTGAGCAC  
CGATGGCCATGTAAAATAAGATGATTTAATGTTGATTTTAAATCCTGTATATAAAAATAAAAAGTCACAATGA  
GTTTTGGGCATATTTAATGATGATTATGGAGCCTTAGAGGTCTTTAATCATTGGTTCGGCTGCTTTTTATGT  
AGTTTAGGCTGGAAATGGTTTTCACTTGCTCTTTGACTGTCAGCAAGACTGAAGATGGCTTTTTCTGGACA  
GCTAGAAAACACAAAATCTTGTAGGTCATTGCACCTATCTCAGCCATAGGTGCAGTTTGCTTCTACAT

### ARID2

GCATTATGTGCAGGTATGATATTTTCTTCACTACTTTTTCTATCTTAATATAGTGTGGAATTTTTATTGTA  
TTATTTCTCCATTCTTAATACTGTACCACATTTCTGCTCAGAACTGCTCACTTCCCTAAATTTGCTTTTT  
TTCCCCAGCGTGAAATGTATCCATTTATAACTGCCTATTGCCTGTTCTATTAGCATCCAAAAATGTGGA  
AGGCCTCCCAACCACCATTTCTGCTGTGTCCTTAGGATGTGCAGTAAAAAATATAGACCTAACAGTTTAT  
GTTATAGAATGGCTTTATTTACTTTGGTGACTGTTTATAGTTTTTAAATAAAAAGACTGAACATTTTCTTG  
AGTCTTCATTTCTGAGTATGCTTAAGACATCTTAAAAATATAGAGAGAATTCTAAATTCAGCTGAAGGC  
AAGGTATAACGGTCACCTACCTATTTGATTATATGTTGATTGATAACATATTTAAATAGAGAACAAATAAG  
AGAGGTCCTTTACATGACAAATTTGCATGAAATAAGCAGATTAACCAA

### TGFBR1

CCCAGGACAGAAAATGTGTAGTCTACCTTTATTTTTTTATTAACAAAACCTTGTTTTTTAAAAGATGATTG  
CTGGTCTTAACTTTAGGTAACCTCTGCTGTGCTGGAGATCATCTTTAAGGGCAAAGGAGTTGGATTGCTGA  
ATTACAATGAAACATGTCTTATTACTAAAGAAAGTGATTTACTCCTGGTTAGTACATTTCTCAGAGGATTC  
TGAACCACTAGAGTTTCTTTGATTCAGACTTTGAATGTACTGTTCTATAGTTTTTCAGGATCTTAAACT  
AACACTTATAAACTCTTATCTTGAGTCTAAAAATGACCTCATATAGTAGTGAGGAACATAATTCATGCA  
ATTGTATTTTGTATACTATTATTGTTCTTTCACTTATTCAGAACATTACATGCCTTCAAATGGGATTGT  
ACTATACCAGTAAGTGCCACTTCTGTGTCTTTCTAATGGA

**DCX**

TAATTGTGACACCAGATGCTTAGGATCCTGGTGCTGGGTTAGCTAAGAGAATAGACAGAATTGGAAAATA  
CTGCAGACATTTCCGAAGAGTTTATAAAGCACAGTGAATTCCTGGTCAATCTCTCCACTGAGGCAATTTG  
GAATCAATAAGCAATTGATAATAGTTGGAGTAAGGGACTTCATATACCTGATTCCTCTAGAAGGCTGTC  
TAACATACCACATGATTACATGAACTGTATGGTATCCATCTATCTCTGTTCTATTGAATGCCTTGTTAAC  
AGCCAACACTGAAAACACTGTGAGAATTTGTTTTTCAGGTCTGACACCTTTTCAGTCTCTTTTTTATAGCAAG  
AAATCAATATCCTTTTTTATAAAAATTCATGTCTGTATTTTCAGGAGCAAACCTCTTCAGGCTCCTTTTTTAT  
AAACTGGTGATTTTTTCTTTTGTCTAAAAAACACATGAAGAAAATTTACCAAAAAAAAAAAAAAAAAAGCAGA  
AGAATAATGTAGTTTAGAAATTATGCTGTCCTGCC

**LPPR4**

TTTCAGGTGCAGTATGATATTTCCCTAATCTTTCCCTATTTCTTAACAAAAGATTTTAAAGTACTTCTCTAG  
TCATTGAAGTTTTTTTTCTTTACATAAATATTGATATATTCTTTTTCTACTCAAAGTGCCAAAGGCTAC  
AGTTTTTAATGACTTAACAAATTGTACCACATTGTTAAGGACATATAATGATAGACACTAGAACTCAGAC  
CTCTGCATGTATATTTGATAACATGTCTTTTGTAACAAAATTCACAAAAAATTTGTTTACATTCCAC  
TGGTACCTTAATTTAAAATAAATCAGACTAAAAGGTGGTATCTCTTCTTAGTGTCTATTTATCTTATTT  
GCTAATGGGAGCACTTCTTCTTTGTTAGGCTGTGCTTTACTGATAAAACCAAGTATTGAATAAAGAGAG  
TTAATTATCTTTTTTAAAGTAAATAAATATGAAAATATATATAGTATATATAAAGTACTGTGTTTAAAA  
AAATGTTATGCAATGTTTTCCAAACTGATAAAG

**ROBO1**

ATACTACCCTTTGCTGGAAGAACTAAAAATATAGCAAATGCAGAACCACAAACAATTCGAATGGGGTAG  
AAACATTGTAAATATTTACTCTTTGCAAACCCTGGTGGTATTTTTATTTTGGCTTCATTTCAATCATTGAA  
GTATATTTCTTATTGGAAATGTACTTTTGGATAAGTAGGGCTAAGCCAGTTGGATCTCTGGTTGTCTAGTC  
ATTTGTCATAAGTAAACCTAGTAAAACCTTGTCTATTTTTTCAATCATCAAAAAGTAATTATAAATACGTA  
TTACAAACAAGTGGATGTTTTTAATGACCAATTGAGTAAGAACATCCCTGTCTTAACTGGCCTAAATTTT  
TTCTGGTAGTGTGAGTTCAACTTTTCAAGAAGTCCACTTAAGGAAGTTTGATTTTTGTTTTTGTAAATGCAC  
TGTTTTTAATCTCTCTCTTTTTTTTTTTTTTTTTTGGTTTTAAAAGCACAATCACTAACTTTATTTGT  
AAACCATTGTAACATTAACCTTTTTTGTCTTATTGAAAAAAAAAATGTTGAGAAGCGTTTTTAACTGT  
TTTGTT

**ETS1**

AGTTTTGAAGCAAAGATGGACTTCAGTGGGGAGGGGCCAAAACCGTTGTTGTGTTAAAATTTATTTTATT  
AAATTTTGTGCCAGTATTTTTTTTTCTTAAAAATCGTCTTAAGCTCTAAGGTGGTCTCAGTATTGCAATAT  
CATGTAAGTTTGTTTTTATTTGCCGGCTGAGGATCTGTGACAAATGAAAGAAAAGTGTTTATATAGACCC  
CATTGGAAAAGCAAAACGCTCTCACTGAGATCAGGGATCCCAAATTCATGGGACTTATATAAGAAGGACA  
ATTAATGCTGATTTGGGTACAGGGGAATTATGTGTGTGAATGTCATCTACAATTAATAAATAATAGCACA  
TCCCTTTACTTACTTGTATCAGTGGATTCTCGGGGTTTGGACTTAATGTTGAGCTAAGAAGCATTAAGT  
CTTTGAACTGAATGTATTTTGCATCCCTGGTTTTTGGACGACAGTAAACGTAGGAGCACTGTTGAAAG

**BCOR**

AAATGAGTAAAAGGAGCTCCACACTTTGACTTAATTTCATACAAAGCTCTGATGACAGGCCATGACTGTA  
GAGTGGTCAGAAGTGTGTGGTTGGTTTGGAGGGAGCGAATTCGGGGAAGGCACCTGGTGTATATAACTTTGT  
TTTGTTTACAGAGTACCTGCTCGGGCCAGGTAAATGCTATTGGATGTAATCCAGTAGTGTGTAATATAAA  
TTCAAACCATATCCACACACAACAATAATTGTATGAACTTTTATATCCTAATTTAAAAGCTGTGAAAT  
TAGTTTTTACGCATCAAACCGGATTGTTTTATATGTTTAAACATTTTATGCTCTTATTTAAGAAGACTTT  
GAGCTATTTTTTTCTGTACCCTGTAAAATATTGAAAACATAAATATGTTGAGGTTGCTTGGAAATGT  
ACATAAACTAAAATTTTTCTGAATCGTGTGTTTATGTTTGA

### RAB1A

AACAAAATTGCCTGAATTGTACTGTATGTAGCTGCACTACAACAGATTCTTACCGTCTCCACAAAGGTCA  
GAGATTGTAAATGGTCAATACTGACTTTTTTTTTTATTCCCTTGACTCAAGACAGCTAACTTCATTTTCAG  
AACTGTTTTAAACCTTTGTGTGCTGGTTTTATAAAAATAATGTGTGTAATCCTTGTGCTTTCCCTGATACCA  
GACTGTTTCCCGTGGTTGGTTAGAATATATTTTTGTTTTGATGTTTTATATTGGCATGTTTAGATGTCAGGT  
TTAGTCTTCTGAAGATGAAGTTCAGCCATTTTTGTATCAAACAGCACAGCAGTGTCTGTCACCTTTCCATG  
CATAAAGTTTAGTGAGATGTTATATGTAAGATCTGATTTGCTAGTCTTCCCTTGAGAGTTATAAATGGA  
AAGATTACACTATCTGATTAATAGTTTCTTCATACTCTGCATATAATTTGTGGCTGCAGAAT

### GTF2H1

ATGCTATTGTACTTGCACATTGGAGACTGAAAGGAAAGAAGGGACTAAATGCTGGGGAGGTAAATTAAGA  
CAGAACCAAATGAGCTAAGTTGCAAATATATATATATACACACACACATATATGTACATGTGTATGTA  
CATATATATTTTTAAAAGACTGTTTACTGCAGTTGCTCAGGAACTGCTTTTGATTACATTAAGCTGCTTT  
CAGAAATTAACAACTTTTTAAAGGTGCATTGATAAAATCTGAGGTTTTTTGGTTGTCGTTTTTTTT  
CTGTGTACATTTTTTCCCTAAGTTTATGGCACAGGGTAGACCTTAAGTATTCCCTCCATCCTTCATTC  
TTCACCCTCCATTGGATCCTCAAGTTTTAATGAATTCCAATTATACCTTACATCAGCAAGTTAAAAAAG  
TACTTTAAATAAAAGCAAAGGGAGACTGTTGCTCAACCATCAGGAAACAGTTGTCAGAAGA

### HOXA3

CCTTTCCTTCCCTTCTTTCTCTCTTCTCCGCCCGCACTCCGTTTCCCGGTTTCCCCCTCGTTGGTAA  
GGCGTTTTTATAGTTTATGTGACGTAGCAATCTTGGTTGCTGGAATGGCTGTATCATAGCGATATTTATC  
TCTTCCGTCTCCTCGATAGGCCACTGGCCCTGCACCCTTTACCTTCTCCACTCTTTGATCAGAAACAGGG  
TATATGAACAAATTTCTAGTCGAGTTTTCAATGTGAATTTGTTCTTACATTATGGCTCCCGAGGGGAAG  
CGATTACTTTTTTTAATTTTTAAATTTTTTTTTTAAATTGCACCTCTTGTAAGAGTGAGAAAAAAATCAA  
AGGCGCTTTGAAACAGGGCTCTCTGTGCAAGGATGACTAAGTGTACGTCTTCCGTGTGTGTATGCTGG  
TGAACAGTCAGATTTATTTATATTTTTTTGCAAGCATTGAATAATCTAAGTTTTAAATATTATTTATCCC  
CATCCGTTTCGTATTTATATTAAGAATTTCTGTACCCTGATGGTTCAGAAGGGTTCTTGGGCCTTTTGTTT  
AATTGTGTATT

### MAP3K7

CAGAACAGGAGGTATCAAACCTAGCTGCTATGTGCAAACAGCGTCCATTTTTTTCATATTAGAGGTGGAACC  
TCAAGAATGACTTTTATTCTTGTATCTCATCTCAAATATTAATAATTTTTTTCCCAAAGATGGTATATA  
CCAAGTTAAAGACAGGGTATTATAAATTTAGAGTGATTGGTGGTATATTACGGAAATACGGAACCTTTAG  
GGATAGTTCCGTGTAAGGGCTTTGATGCCAGCATCCTTGGATCAGTACTGAACTCAGTTCCATCCGTAAA  
ATATGTAAGGTAAGTGGCAGCTGCTCTATTTAATGAAAGCAGTTTTACCGGATTTTGTTAGACTAAAAT  
TTGATTGTGATACATTGAACAAAATGGAACCTCATTTTTTTTTTAAAGGAGTAAAGATTTTTAATTCTGTGAT  
TGTGTGTATGTGTGTTGAAACTGTAAAGCTTTTATGACTCTAATATTAATCTCTTAAATGAAATTAAG  
GCAAAAGAACATGATTGAGC

### TBX5

AATGATATCTCGCCAAAGAAACCACGCCACACCAATGCCAACACAAAACCTGTGTTTACTGAAAGCCGAA  
AACAGTATTAATAAAGTGTGTAAGTAAAGTGTATGGTAGGGTCTTCAGATGTAATATTTTACTGGTA  
CTATTTATTTATAAATAGGAATTTCTAATTAAGTAATAACATGAAATGAAACCCAGCATAGGAGCTGGCCA  
AGAGCTTTTTAATTTTATTGATACTCAAACCAAGTTTGTGTTTTTTTTGTTTTTTTTTTGTTTTTTTCCCTCT  
TTCGAATGTGCTTTGCTTTTTTTTTGATTAATAAAGAATTTTTTTTTTCCTTTTTTATAAACAGACCCTAATA  
AAGAGAACAGGGTAAGATGTGAGGCTGAGTGTGTTAAGTACGTGAGAGAGTGTGAGTGTGTTTGTAAAGT  
GAGTGTCCCTATGCGATTATGTCTCTTTACGTTGCTAAGGG

### TFAP2C

TGGGAGACTCTTTGAAATGACATGTTCCTTTAAAGTACTGAAGCTTTATTTGCATATTTATTTTTCAGATGT  
TTCGAGTAAACTTGAAAAGGGTAGGCACGAAGCAATTTGTTGCTGCTTGTACCCCCAAGTCCCCGTGGA

GGTCTGTATTTTAAAGAAACAGTGC GTT GAGTGTACAGATTTTATTTATGCGTAATTTAATGGGGTCTGT  
AAATACTGGTGC ACTTCTTACGACTTTTTT GAGACATGGGATCCAATTTAATATTA ACTTTTAAATGGTG  
ATGGGGTAATCTATAACACATCATAAGGTTTTATTCATATATATACAGGGTATTAAGAATTAAGAGGATG  
CTGGGCTCTGTTCTTGGCTTGGAAGATTCTATTTAATTGAAACTCTCTGTTTCAGAAAGCAATAACTTTGT  
CTCGTTCCTGTTGGGCTGAACCCTAAGGTGAGTGTGCAGTACAGTGTGTGTGGGTGAAATGGAGATTTGG  
AATTGAACTCTCTGCCTGTAAATGTTT

**DST**

AAGAGGCGAGTTTAAAATTCTGCAGATGGCCTTATTTGTGTATTTGTCTTTTTTATTTTATCTGTATAATT  
TTTTTTGT CAGATATCTGGGGTTAAAGT CACATCATATGTGAGGAGGAAAAGTTAACATGAACTAACA  
TTTCTGCACTGTAACGTGCCGGGCACACACTAAACTCAGTTACTGTACCTACAGGTAAGTCTACATCCTC  
TCTGACAGCCACAGCACTACATCAATCCCTGACGTTAGGGATACCTCATGACATTTTCCTGTTTTTATGG  
AAACTCTGAGAAGCTGAATGATACATGCAGGGGATATTTTTT GAGATGATTTAAATGTAAACCAAAAGAT  
GGAAGACAAAAGACAAACACACCCACACGCAGTCTTTCAGTATCTGACAGAGAACTCACAGGAAGTTA  
CTTCAAGCACTTGCCAGTACTATGATATTC AAGTACCTTGCAGCATTTCTCTGCCATTGCTTTCAATGAG  
GCCAGAGGCATCCTGGATATTAGACCTATTATACTGTAAGAATATAAGTATAAAGTGC GTTTCATATACAT  
GTGAGGTTTTCTTTTGCTTGAGTG

**GABRB3**

GTCAGTGTGAGCCATTAGAGTAAACATCGAATCTTGGGGCAAAGAACTGCCCAGGTGAATTA AATTTTTTCC  
AGGACACTAGCTAGTGTGCCTTG GATTGATTACCTCTTCTACTGCATTGAAAGGCGCCATGTTTTCTCGA  
AATACTAAATTCCCAACACCTGGGTAAACAATGACCTTCCAGAGAGTGGCTCCCGTATGCCTCTCCCTAG  
GACCAACCCCATGAACATGTTTTGT CACGTTTGTCTCATGTTTCTACTTCACAAGTCAGTGAGTGTGTTT  
AAGGTAAGTACAGGATTATTCTAGTAGGAATAGGCGATTGCTGTCATAATCAATTCTCATGTTGATTTCA  
TTTTATTGTAAAGATAAATTTAAACCCAGTTTTGCTTAAGCACATTGATGTAATTTTTTGGTATTATTTG  
ACATGAAAAACAGCAA AATTGAGTGATAGATACA

**RPS6KB1**

TGCTGTGGAAAGTTTATTGAGAACTTGT TTTTCATAAATGGATATCCCTACTATGACTGTGAAAACATGTCA  
AGTGT CACATTAGTGT CACAGACAGAAAGCACACACCTATGCAATATGGCTTATCTATATTTATTTGTAA  
AAATCCAAGCATAGTTTAAAATATGATGTCGATATTACTAGTCTTGAGTTTCTAAGAGGGTTCTTTATGT  
TATACCAGGTAAGTGTATAAAAGAGATTAAGTGCTTTTTTTTTCATCACTTGATTATTTTCTTTAAAATCA  
GCTATTACAGGATATTTTTTTTATTTTATACATGCTGTTTTTTAATTA AATATAATCACTGAAGTTTACT  
AATTTGATTTTATAAGGTTTGTAGCATTACAGAATAACTAAACTGGGATTTATAAACCAGCTGTGATTAA  
CAATGTAAAGTATTAATTATTGAACTTTGAACCAGATTTTTAGGAAAATTATGTTCTTTTTTCCCCTTTA  
TGGTCTTA ACTAATTTGAATCCTTCAAGAAGGATTTTTCCATACTATTTTTTAAAGATAGAAGATAATTTG  
TGGGCAGG

**SBK1**

ATTTGAGGGGCTCTTTGATGGGCCAGGCCGGCCAGAGTGA ACTCCGAGCACTTTCTGGCTGGTGCCCCAA  
CCTCTCCACTCCCCACTCATTCCCACCTTGA AAAAGGGCTATAGGTCCCCTGCCCTGCCGGGGTCCAGTT  
TACAAACAGTGTGGGGTGGCCCCAGGGCCTGGCCCCACTCTCCCTGCTGTGCCCACTCCTCTCCAGACTC  
CACCTCCCCAGTGGGTATGGGCCCTCCACATGCCAGGTAAGTAGCAAACCCCACTCCCTCCAAGGACCA  
GGTCTCAGAGAAGGCCCTGGTCACTGCCCCCGGCCACCTGGAGCCCATCGGGGCTGCCTCTCCAGCCG  
CGACTTCTCCTTTTGCCTTAGGCCTCGCGACATCCTGATCTCTCCTGCAATAACTAGGAATCGAGATTCC  
ACAGTAGACGTCCCTTGCCGTGCTCGCTCTCTCTCTCGCGCGCTCTCTCTCCTCTCTCTCTCTCTCT  
CTCTCTCTCTCTCTCTCTCTCTCTCTCTCTCTCTCTCTCTCTCTCTCTCTCTCTCTCTCTCTCTCTCT  
CTGTTCCGGGAGTTTCCCAGCCGTTGTAGTATCTAGTAT

**ARID1A**

AAACCACCTCAGAATCCAGTTTACCCTGTGCTGTCCAGCTTCTCCCTGGGAAAAAGTCTCTCCTGTTTC  
TCTCTCCTCCTTCCACCTCCCCTCCCTCCATCACCTCACGCCTTCTGTTTCCTTGTCCCTCACCTTACTCC  
CCTCAGGACCCTACCCACCCCTCTTTGAAAAGACAAAGCTCTGCCTACATAGAAGACTTTTTTTATTTTA  
ACCAAAGTTACTGTTGTTTACAGTGAGTTTGGGGAAAAAAAATAAAAATAAAAATGGCTTTCCAGTCCTT  
GCATCAACGGGATGCCACATTTCATAACTGTTTTTAATGGTAAAAAAAAAAAAAAAAAAAAAAAAATACAAAAAAA  
ATTCTGAAGGACAAAAAGGTGACTGCTGAACTGTGTGTGGTTTTATTGTTGTACATTCACAATCTTGCAG  
GAGCCAAGAAGTTCGCAGTTGTGAACAGACCCTGTTCACTGGAGAGGCCTGTGCAGTAGAGTGTAGACCC  
TTTCATGTACTGT

**NFAT5**

TGATTGAGAGGCATTGAATTACGTTTTTCAGTAGTACAGGCTTCTTGCCGATATGAAGGGAACTTTTCAGA  
AAGAGACCTACTCTGGGTCATTTAATTTTGAATACAGTTTTCAATCGTTCAAGTTTTGGATGGTTTTATAT  
CTAATGTGTGTTTTCATTTTTTTGGAAAGCTATATTTTGTATTTAGGAAATGGTATACTATTTTGTATTT  
GTACTGAGTGAGTACATTTGGCATAAATATAGAAATTTATATATATACATATATATAAACTATTTCTTTTT  
GCCACACATTTTTGTGGTAAATTTGTGAGTTTGTCTGATGTTCTACCACAACGTGGCGTCTGATAACAGT  
GAGGGGGGGTGGGGTTTTGTTATGTCTTTATTGAGTATTTAAGTATCTTTTGAACAAATGACCTGTTCAT  
CTGTGGCCATTCCATCAGGCAGTTAGTTCCTTGATGTCAGTAGTGGGCTAAAGGCAGCTTACTGTGTGTT  
TGCTGGAGCTTTCACTCAGCCAAGTGTAGAGTCAGGAAACCCATTGAGGCAATGGCGTCAAATGGTGT  
TCACAAGAATGAGCCATTCAGTCTTTGCTCACTATATATTTAATATTTTATTATTGTTGTTATTGTTATT  
ATTAATTGGCTTTCTGTATTCTATGCCTTTT

**RYBP**

ATACCACGCAATCTTTCACACTCGTGCGTGTGCGCGCACACAGAGCTTACCTGACTTGCTCTGCTTGAGT  
CATGCAGTTACAAAAAAAAGACATCTTGACACCCACACAATATCTAATCAAAACCTTTCAGTTTCAAT  
CTGGATATTTAAAAACATTGGCAGAAGCTTCTGTGAGTTTAGTTCCTAAGATGTTTCACCTGCCTTAT  
CAAGACCATTCTCAGTCTACTTTTTTAAGCTACCGTATCTTAAATATTGAAAATTTATTAATTGCTGAA  
TATATAATAACCTTTGCTTGTATGTAACCGAAAAATGGTTTAAAGGCCAACATTTAGAGTATGACAATGGA  
GCTGAACAGTTTTTAAATGCGCAAGCAGTCTGTCTTGTGTATGACTTGTAACCTTAAATTTACTGTGTAA  
AGATGGTTACATTATTTCTTAGCTTTGTTTGTGGAGACAAATAGAGAATGCTTGTAAAGTATGTCAA  
ACAATCTTATCTTGTGAATTTTTGTTAATGTATTATACGAGCTATATTTTTTCATTTGCCAGAAAGACAG  
CTTGTATAACGCTTTTGGAAAG

**SOX11**

GGTTGATCTGGAAAATCTGCTCTTTGATAACAACCTCAGGATTTTTTTTGTTCAGTTTTGGTTTTTGGCCC  
TTCTGTGGAGCCTACATTTTCAACCACAATAAAGATGAAACAAAATTTATGAACTGAGCTCTCTTCCA  
TTTTACTTACTGCTGGCTTTTTTTTTTTTTTTCCTTGATTCCTACCATACCTTCGTTTTTTTTTCATTGTACTT  
TTTTAACACTACCTATATCCATTAGCTGCCTAATTAGTTTTATCTGTTCCATGTGGATGCAGTGAGTTTA  
TAAGAGAATTTACAAACAAGTAGTTTTTTAGTGAACTTAAAATAAACAGAATTTTAAAGGAGACCTATT  
TTTATACTCAATAAAAAGCACAAAAGTGCAGAAAGTATAAAACGGCTTACAAAGGGAGACACAAGCTCATA  
ATGTTCCATGTATAAAAAGTAATAACTTTATTGGGTAGAGATATTTCTTACAAGATCTAGCACCTCTGCCAG  
TGCACAGATAGGACTGTTTTAAATGATTTGGGAACTTTTGGTTGCCCTGCAGTTGTGAACAGAGAACTTCT  
CTACAGAGAAACAAACCACTAAAAGCAATATGACCGAGT

**SYNJ1**

CCACCTAAATTCCTATGTCCACACTTAACCTTTAAAGATGTACATTGAGGGAATATCAAAAAATAGCGTT  
CATGGCTACGAATATGTAGAATGTTAAAAGCACAGCAAACCTGCACTGCACTTATAAAGCAAATCTATTAG  
AAAAAAGCATTTTTCTAAATGCTCAAATGTTATCAAATACTATATTTATAGAAGTAATCTTCTCTGTT  
AACAGCCAAGATTTGCTGTTAGAAATAACTCTTGTGAGTTTTATATTGTGCTTTTTGGAGGTTCTAATCA  
TTTCAGCAGTAGCGTCTTAAACAGCAGTATTACTATAAGCAGTTGCTTCAAATGTGAATTAACCTGTTG  
AAACTGTGGCTTTAACATCCATGTGACTAGTGTATATGGTATTTGCTCTCCATTAGCAAATAAATTCATT

GTTAGGTAAACTTCACTAGTGCAAATTGCAGATCTGTGAGCAATGTTTCCTATTGAATATAAACTACTGT  
CTAAAATATACATATCAGCAGCCCAGC

### ETV1

CAGTCAAGCAGGGCGTTTTTTCGCTTTTTCTGCAAGATACAGAGAATTGCTGAATCTTTGTTT  
TATTTCTGTTGTTGTATTTTATTTTAAATAATAATACACAAAAAGGGCTTTTTCTGTTGCATTATTC  
TATGGTCTGCCATGGACTGTGCACTTTATTTGAGGGTGGGTGGGAGTAATCTAAACATTTATTCTGTGTA  
ACAGGAAGCTAATGGGTGAATGGGCAGAGGGATTTGGGGATTACTTTTTACTTAGGCTTGGGATGGGGTC  
CTACAAGTTTTGAGTATGATGAACTATATCATGTCTGTTTGATTTATAACAACATAAGATAATGTTTA  
TTTTATCGGGGTATCTATGGTACAGTTAATTTACGTTGTGTAAATATCCACTTGGAGACTATTTGCCTT  
GGCATTTCCTCTGTCATTTATGAGTCTCTGCAGGTGTACAAAAAACCCCAATCTACTGTAAATGGCA  
G

### FNDC3A

CTCACTCTGTCTGGTATAGGCTAATTTGAAGAACTCCCATAGTTTCTGCTGCTTCTCCATAACTGCT  
GCCACCACCATCAGAATTCATAATCAAACCTAACCTTTTTGTTTGGGGCACCAAACTGAAGACAAAATT  
AATTTGCACCAGTAACTTCAAGCTGCTTTCTTTCTTGAAAATAAACGTTTAAACGTATAATGTCTGTTT  
GGATACTGTTCCAAAATTGTTGATTGCATGTGGTTAATGTTGCATTAGAGCACTTTGCAATTGCATAATTC  
ATTAATGTTTTGTGAGCTTGCATTTGTGAGTTATTGGATGATCAGACTGAATTTTGTCAAGTATCACATT  
GTACATCTTGCCTAGATGTGATGACTGCAAGTAATAATACAGTTTATAATGAACTATCTACAATTCTT  
GTTTTAGCACATCTGTTATCCGTAAAACACCTGTAAGTACTGCTT

### FZD5

GGGCGTTTTGTTTGGTAGTTTTGCCAAGGTCACCTCCGTTTACCTTCATGGTGCTGTTGCCCCCTCCCGC  
GGCGACTTGGAGAGAGGGAAGAGGGGCGTTTTTCGAGGAAGAACCCTGTCCAGGTCTTCTCCAAGGGGCC  
AGCTCACGTGTATTCTATTTTTCGCTTCTTACTGCCTTCTTTATGGGAACCCTCTTTTTAATTTATATGT  
ATTTTTCTTAATTTGTAACCTTTGTGCACTTTGGCAACAATTTACCTTTGCTTTGGGGGCTTTACAATCC  
TAAGGTTGGCGTTGTAATGAAGTTCCACTTGGTTTCCAGGTTTCTTTGAACTGTGTGGTCTCAATTGGGAAA  
ATATATTTCTATACGTGTGTCTTTAAAAAAAATGTGAACAGTGAACGTTTTCGGTTGCTGTGACTGGGA  
AGTTGTTGGGTGTGCTTTTTTCAGCCAGCTTCTCCTTCCACTGCTTAAAGTGTCCATGATTCTTTAAGGTG  
AGCTGCAGTT

### ROCK1

CCCTCACTGTAGAATTTAAAAGCCTTACTGTTGATTGCCCATGGTGGACTTGATGGAGAAATTTAAATATC  
TTTCATTATGCTTTACAAAATACTGTATATGTTTCAGCAAGTTTGGGAATGGGAGAGGACGAAAAAAG  
TTACATTTAATCTATGCATTTTTGCCAAGCCATATTGAGTTATTTACTACTAGAGACATTAGGAACTA  
ACTGTACAAAAGAACCAAGTTTAAAAGCATTTTGTGGGGTACATCATTCTATAATTGTATAATGTATTT  
CTTTGTGGTTTTAAATGATAAAGACATTAAGTTAACAAACATATAAGAAATGTATGCACTGTTTCAAATG  
TAAATATTCTTAGAACACTTTCAATGGGGGTTGCATTGTCCTTTTAGTGCCTTAAATTTGAGATAATTAT  
TTTACTGCCATGAGTAAGTATAGAAATTTCAAAAATGTATTTTCAAAAATTTATGTGTGTCAGTGAGTT  
TTTCATTGATAATTGGTTTTAACTTAAAATATTTAGAGGTTTGTGGACTTTTATAAATTTGAGTACAATCT  
TTGCATCAAACCTGCTACAATAATGACTTTTATAAACTGCAAAAATGTAGAAGGTTGCACCAACAT  
AAAAAGGAAATATGGCAATACATCTATGA

### WNT5A

CTTTGGTTGTAGGACAGGAAATGAAACATTAGGAGCTCTGCTTGGAAAACAGTTCCTACTTAGGGATTT  
TTGTTTCTAAAACCTTTTATTTTGGAGGAGCAGTAGTTTTCTATGTTTTAATGACAGAAGTTGGCTAATGG  
AATTCACAGAGGTGTTGCAGCGTATCACTGTTATGATCCTGTGTTTAGATTATCCACTCATGCTTCTCCT  
ATTTGACTGCAGGTGTACCTTAAAACGTTCCCAGTGTACTTGAACAGTTGCATTTATAAGGGGGGAAAT  
GTGGTTAATGGTGCCTGATATCTCAAAGTCTTTTGTACATAACATATATATATATACATATATATAA  
ATATAAATATAAATATATCTCATTGCAGCCAGTGATTTAGATTTACAGTTTACTCTGGGGTTATTTCTCT

GTCTAGAGCATTGTTGTCCTTCACTGCAGTCCAGTTGGGATTATCCAAAAGTTTTTGGAGTCTTGAGCT  
TGGGCTGTGGCCCTGCTGTGATCATACCTTGAGCACGACGAAGCAACCTTGTTTCTGAGGAAGCTTGAGT  
TCTG
